# Supplementary material for: LincRNA-EPS increases TGF-β expression to inhibit the Wnt/β-catenin pathway, VSMC osteoblastic differentiation and vascular calcification in diabetic mice
Source: PubMed Central journal article supplement — Exp Ther Med. 2022 May 4;23(6):425. doi: 10.3892/etm.2022.11352 (PMC9121197; doi:10.3892/etm.2022.11352), 2022-05-04
Supplement: Supplementary_Data.pdf [file Supplementary_Data.pdf]

Appendix S1. Sequence of lincRNA-EPS and scramble control. lincRNA-EPS, long intergenic non-coding RNA-erythroid pro-survival.

lincRNA-EPS sequence

ACATTTTCCTGGAGCGGCTGGGAAAGAGGAGTCTCTCGAAATTCAGCAAC  
TGCTAACAGCGAGGAGGGGGTGCTAGCCAGGATCACTCCCTCCGAAGTCA  
CACCAGAGGGAGGGCTGGAGGGGAGAATCAAATGAAAGAGAGAGGGGAGAG  
AAAGGAAGGAAGAGAAGGAGGGGAGAATGGAAGGATGTATGGATTTGGATG  
TATGGGTTCCATTCCTTCTACCCTGGCAAAAGCTTACTCATCCTTCAGTGTC  
CATCCAAAATGGCATCTCTTCTTGGGCACCATCTCCAGAGTCTCCTGCAAG  
CAGGTAGCTACATCCCACAAAACAACCACCCATCTGACCATGCAAGTGTGT  
GGGGGAATGAAGACCAGCCCAGGAATCTGAGATGAATGTTTTGCTTCTTGC  
TCTGCCACTGACTCACAGGGTACCCCAAGCAAGTCCCTTCACCTCCTCGGT  
CTCAGTTTCTCCATTTATACTACTAAGGCAGTGGACATGATGGCCTCAAGTC  
TCAACATTTTTATTCCCTGAAAAGAACTCTTGGTGCTGAGTGGTCTTCTTC  
TGCCCTGACATCTCACCTTTCAAACGCTTGTCTCTTCTCACCCACCCACCA  
CTTAGCATGTGCTCTTGGAGAACACCCAGGACTCAGGGTCTCTGCACACAT  
CATGAGTCCAGCTCAGCATTGAGGTGGAATCAGAGGAAAGGAAGGAGAG  
TGGGGAGAATAGTCAGTATTTGGCAAGCTCATCATACTTCCCCCTTTGTA  
TAGAACTTCAAACCATTTCCCTTTGAAGGCACTACCTCCTTCCCCCAGTTA  
TAAATGAGTGAAGGTCTCAAGCCTGGACAACCAAATGCACAGTGATTGGTT  
CAACTCTGGACCTGTGACTCAAGCCAGACCAAGGGAGTGACATGCAGGGC  
TTTGCCTGGAACCTATTCTGAAAGGGGCACTCTCTTTCTGCTGGGCTACTGAT  
AATATGTGCATCCGTGATAGAAGAGCCTGCCTGATAATAAAGCCAATAAGG  
GAAGAGCAGAGCCAAGAGATGGTGGGAGAGCAGATGCCTGAAAATATCAT  
TTGAGCCCCTGGGTCCAGCTGCACCTGAAGCCACCACGATCTCCTGGACTT  
TGCAGTTACTTGAGTTCATAAATACCCTTTGGCATTAAAGCCAGATTGAGTCT  
TAATGCATATAGAAATAAGAGAAATGAGAAAAGAAATTGAAAAGAGAGAC  
AGCAGAGAACTGATTCTCTACTAGAGCCTCCAGAAGGAATCAACTCTGCCA  
ACACCTTGATTTTGGACTTGTGGCCTTCAGAACAGTGAAATGATAAACATC

TGTTATTTTAAGGTACCTAGTGTGTAACATTCCGTCATGACAGCCCTAGGAA  
ATGAATACAGCGAGGAAAATCCTACCAGCACAAAGGCATGGAGGTGCCAG  
GATGTCTCCTCTGCGTGAAGAGTAGATGTAGATGAGGCTGGAATTATCTATC  
CTAGCTGCCCAGACCCATGTGCCTTTGTTTTATGTAGTTACAGCACCTATGA  
TACATATTTGTTACCATGTATGTCACCTATGAACCTCCTCTGGAGGACGGAGA  
AGTCAAATACCTTAATTATTCCAACACAAGCTTGCGTGAACAGATAATCATC  
ACTACGAGTATATTGTGTGCCTGCTAAGCACCACACCTGAGATAAGCATTG  
CTGTGGTTTGAATGTCCCCTCAAAGCTCATGCTAAAATTTAATTGCCATTG  
CAACAGTGTTGCAAGGTGAGAACTTTAAGAGATGATCAGGTCATGAGAAC  
TCTGCCCTCGTGAATGGATTAATACCCTTATCGCAGTAGTGGACCCCCCTT  
TCTCTTGCTGTCTGTCTCTCATGTTAGCTTGTGCTTCCTCCTTTCACCATGGG  
ATAACACAGCAAGAAGCCCCTCACCAGATGCTGGCACCTTGCTATTGGACT  
TCCGGCCTCCAGAAGTGAAGAAATACATGTCTTTTCCTTATAAATTACCCAGT  
CTGTGGTATTCTGTTATAGCGGCAGAAAATGGACTAAGACGGCATTTTGCAT  
ACATTATCTGTCTTATTAATAAATAATGTTTTTGCCCAGG

Scramble control sequence

TTCCGAACCCAGTAGCAGATGAGTATAATTTTTTTCCTCAATAAACTGATAC  
CCGGCCCATAGAAACCCCGGTAATAAGGGACAGCCCTAGTTGAATTAGCGT  
AGTTTTCTATGGCAATCCAAACATAGAGATTGCAACTGATCGTTAGAGCGG  
CGGTCAGTCATTAATTAAGATACCGGTCTAACAACGTGCGCACACAACCTCG  
AAATCTAATAACTAGACGCTCAGTAGACCGGTGACCCATGTATTCTCAGA  
ATACAATTGGCCAATACTTGCGTGAAAAATAGAGCCCAGCTTTTAGCTGAG  
GACTTCATCATCAAGCGATCAAAGGATCTTGTCAGTTAAGCTTCACCCCATC  
AGCTTTATAGGTTATATTGGCGACCGCGACGGAGTTTGAGGGTGCGAGAAG  
CGAAATCAAGTACTAGATATACTATCTCTAGTGCCAAAGCCTGATAGTAC  
AGTAAAAAAGAGGACCTCCCGCCTAGGTCAGACCTTGCTTTCTTTATTCTA  
AACGGAAATGCTGTCTACCACACCACTGGTGGGGACTATCAATGGAGAGTC  
ACCACGGCAAAGGTATGATAGAATAACAAGAACGTGTGACCGCTACATTCA  
TAAATAGGTCATTTGCGCACTGGGTCTCTTGTACCAGTATTTGACAACGGGA

AAACTAACAACACAGTTCCTACTTAATAGCTCCGGATCAGTCACGTA  
CAGTTTCAGATGAAATAATTCGACTCAAATTTAAGAAGAAGCAGAACTG  
GATAACAGTACCGATAGTCGTTTTGGATAACGATATTGCAAGTCTGGCATGG  
GGACCCTTCCGCAATGGTCCTGTGGTGTACGAGTGTTTTGTAAACCAACA  
CCAGTACCTTTAGGATGTATAATGAAAGGGCCTCAAGGCCGGTACATACAAT  
TTACTTAAGATGAGCGAAAGACTAGCCTTCCGCGTCACGCTAGAATCGTA  
AGATTGTTTGTGGTTCTGATTCCTGGCACTTGGTTCTGACGATAATCAC  
CCAGCGAACTGCGTTATCTCTTAACTGAGAATCTGCGTCACTGACGCGGT  
GGTATACCGTTCTCTAAGCCTCGCCCATGCTTTCTATAGGGTCGCACGACA  
GGCCGGGATTGTGGTAGCTGCCCGCAGGTTACCGTCTTTGACTTCCTTCTCC  
TGAGACAACGTACTGGATGCCAGGGGAGTAAACGACACTACGATATGTT  
TGAACCAATACCTGTACCGGGCATAGTGCCCGACCAATCTTTAGTCACAC  
ACCCACGTGACTCCGTAACTACTTGGCCGGAACATGGATATCTGGCGTATA  
ACGCATCCCCAAGATCTGTCACTGGTTTTTCGAGGTTTCAGCCGAGGTCTGT  
ATAAATCGGATCAAGTTACTACCCGAGTTGCCGCCACATCGTGCTGTGATAC  
TGAGCCTCATACTGATAACAAGGTGAGAATCCACAATTGAACCGAGTTAA  
AAATCAGCGCTAAGTGAAACGACAATGAGGACTTTAGAGCCATGGGTCTAT  
CATGTTTCTGACGTTTCGACGGTAATTACCGATGTGGTCCGAGATACTGATGT  
AACTCTGGTGAACTGCTGTAAATTAGATCCGGCCGCTTGAATGAGTTAAC  
GTTTATTTGTTGGTCCTCGGGTTCTCATCAATGCTTCAGCTTAACGGGAGGG  
TGTACAATCGGGAGTCTAGCTTGCCCGGAGCCTTCACAGTTTGAAAACCTC  
ATTAGGCAATTGCTGAAGCGCAAACCGAGTGAAGCAAGTAACCGCGACCA  
CCGGTCGACGATTATGTCTTGAACGCCTAAGAGCGTACCCCGTGAGCAGCA  
ACCATTCAGTTTAACTGGCATGCTTCCCTCTACTGAGCTTTATATTGCGAAA  
AGCTGACAACGTTCTTCTGAGGCCTTCTCAAATCAGCACTACGCACAACAG  
GTCGACAAACAATCACCGGGAAGGTTGAACATGTCGCTGCTATCACAGAAT  
CTGGGGGGTTTAGCGAACGGCTTATATAGCCAATAAGGGGATGCTCGTTAGT  
CTAAAACCTCGTTTGAGCCCAGCTCCAATACTC
